# Supplementary material
Source: HighWire-hosted journal article supplement (https://jitc.bmj.com/content/10/10/e005103)

Multi-depletion Study

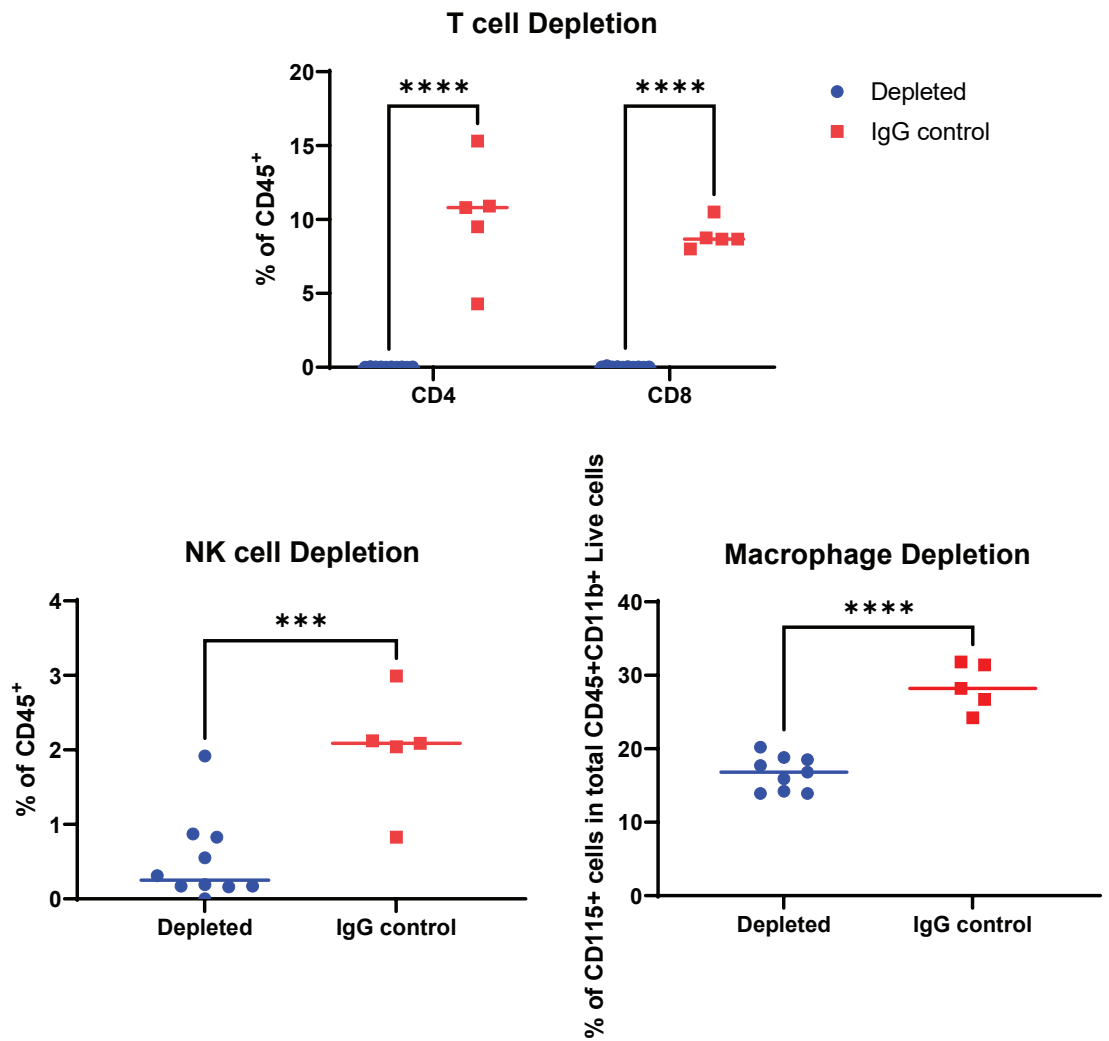

Systemic Disease Study

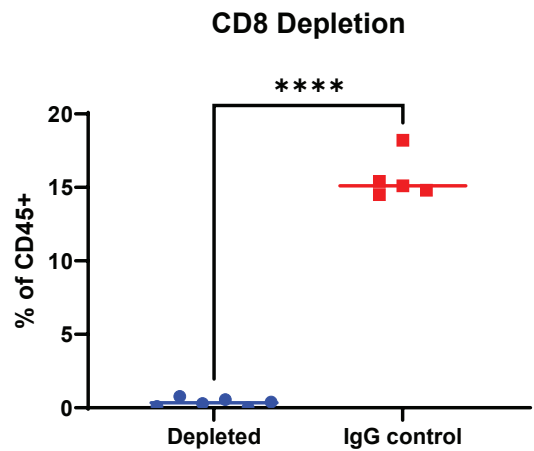

Supplement: inline-supplementary-material-1 [file inline-supplementary-material-1.pdf]

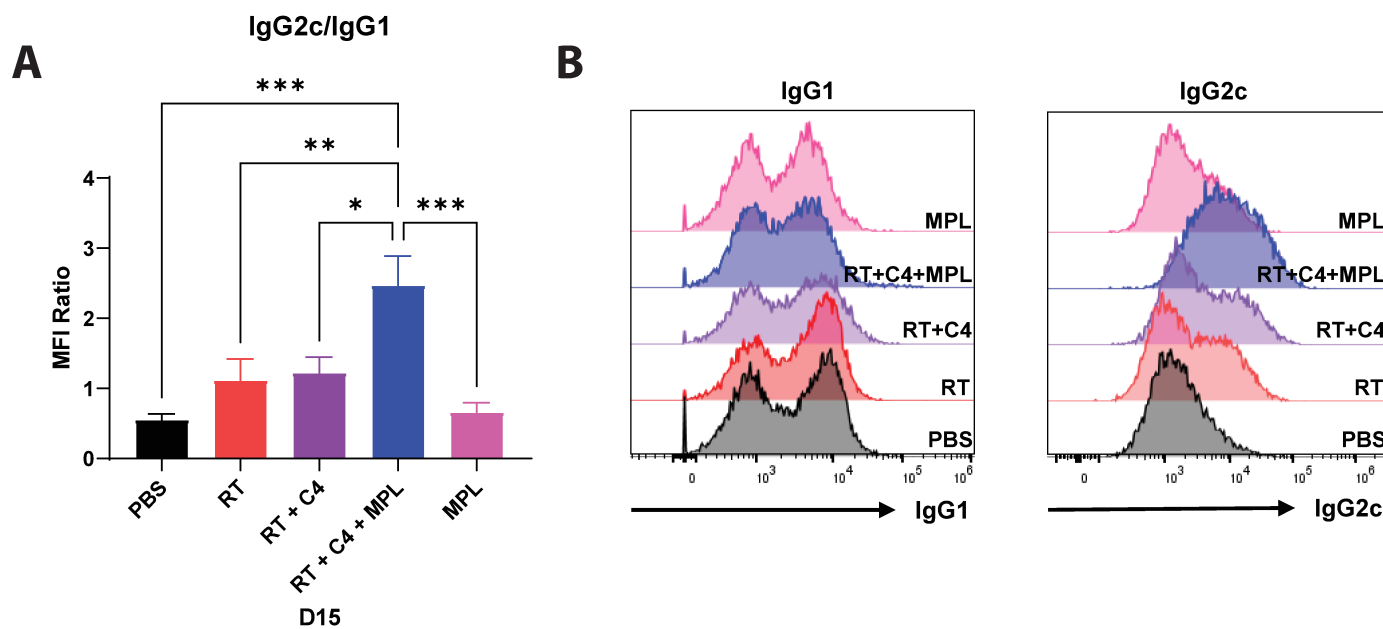

Supplement: inline-supplementary-material-6 [file inline-supplementary-material-6.pdf]
